# Supplementary material for: The 5′UTR in human adenoviruses: leader diversity in late gene expression
Source: PubMed Central journal article supplement (PMC5429599; doi:10.1038/s41598-017-00747-y), 2017-04-04
Supplement: 41598_2017_747_MOESM1_ESM.pdf [file 41598_2017_747_MOESM1_ESM.pdf]

**The 5' UTR in human adenoviruses: leader diversity in late gene expression**

**Mirja Ramke, Jeong Yoon Lee, David W. Dyer, Donald Seto, Jaya Rajaiya, and James  
Chodosh**

**Supplementary Information**

## **SUPPLEMENTAL FIGURE LEGENDS**

### **Supplemental Figure 1. RNA secondary structure prediction.**

The RNA secondary structures for (A) HAdV-A12, (B) -B3, (C) -B11, (D) -C2, (E) -D37, (F) -E4, (G) -F40, (H) -G52 were predicted using Mfold. The secondary structure with the minimum free energy, i.e., most likely to form in nature, was chosen, and the energy indicated below each structure. dG: final  $\Delta G$  for a secondary structure is the sum of the free energies assigned to all of the loops and base pair stacks.

### **Supplemental Figure 2. Complementarity between TPL1-3 and 18S ribosomal sequence.**

(A-C) TPL1-3, respectively, for selected representative virus of each HAdV species.

Complementary sequence is shown in yellow and splice sites in green.

**Supplemental Figure 3. Mouse adenovirus type 2 has a bipartite leader.** (A) Schematic for the mouse adenovirus type 2 (MAV-2) leader structure as determined experimentally for MAV-2 hexon and penton base mRNA after infection of CMT-93 cells for 24 hrs. (B) Percent identity for MAV-2 BPL1-2 as compared with HAdV TPL 1-3, and start and end nucleotide locations and length for BPL 1 and 2.

**A**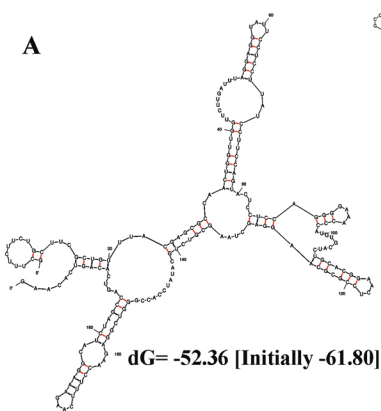**B**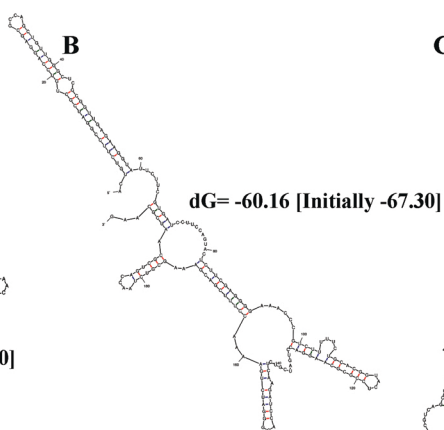**C**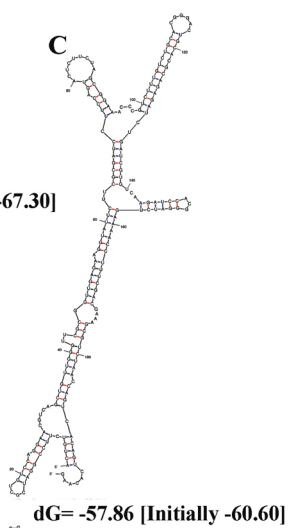**D**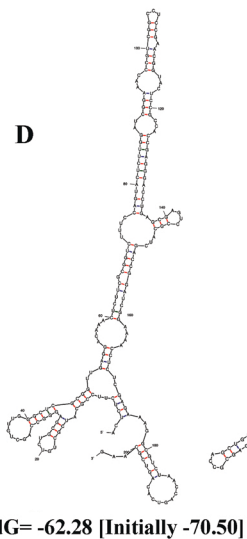**E**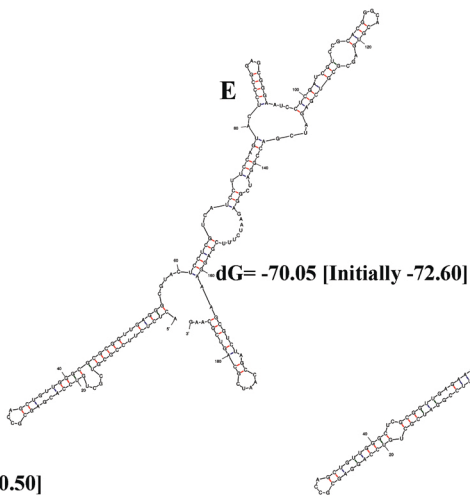**F**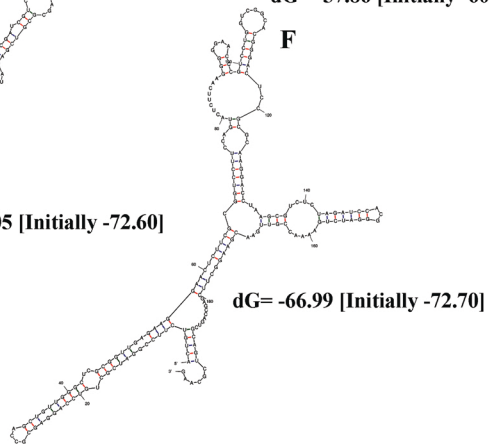**G**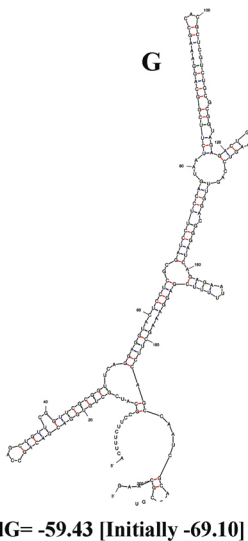**H**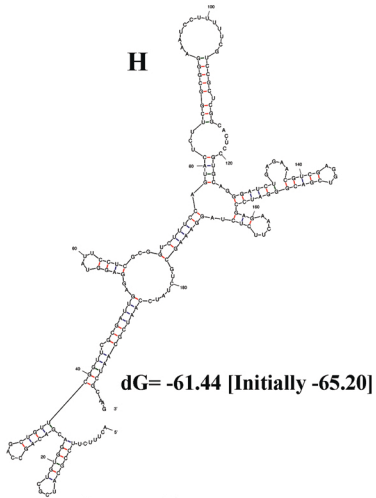

**A.**

HAdV-A12 GCUUUCUUCUGCUUCGCUGUUUAACGAGCGCCAACUGGUUGG  
HAdV-B3 ACUGUCUUCGGGAUCGCUGUCCAGGAGCGCCAGCUGUUGG  
HAdV-B11 ACUGUCUUCGGGAUCGCUGUCCAGGAACGUCAGCUGUUGG  
HAdV-C2 ACUCUCUUCGGCAUCGCUGUCUGCGAGGGCCAGCUGUUGG  
HAdV-D37 ACUCUCUUCGGCGUCGCUGUCCACGAGCGCCAGCUGUUGG  
HAdV-E4 ACUGUCUUCGGGAUCGCUGUCCAGGAGCGCCAGCUGUUGG  
HAdV-F40 ACUUUCUUCGGCAUCGCUGUGGACGACAGCCAGCUGUUCG  
HAdV-G52 ACUUUCUUCGGCAUCGCUGUGGACGACAGCCAGCUGUUCG

**B.**

HAdV-A12 UUCUUGAUUUAGGAGGUAUUCUCCUUAUCCUUCAGUACUCCUCCAGGGGAAACCAUUUGCAUCUGCACG  
HAdV-B3 CUCGCGGUUGAGAAGGUAUUCUUCGUGAUCCUUCAGUACUCUUCGAGGGGAAACCGUCUUUUUCUGCACG  
HAdV-B11 UUCGCGGUUGAGAAGGUAUUCUUCGCGAUCCUUCAGUACUCUUCUAGCGGAAACCGUCUUUGUCUGCACG  
HAdV-C2 CUCGCGGUUGAGGACAACUCUUCGCGGUCUUUCAGUACUCUUGGAUCGGAAACCGUCGGCCUCCGAACG  
HAdV-D37 CGCGCGGUUGAGGGCGUACUCCUCGUACUCCUUCAGUACUCCCGGAGCGGGAAUCUCUGAUCGUCCGCACG  
HAdV-E4 CUCGCGGUUGAGAAGGAACUCUUCGCGGUCCUUCAGUACUCUUAAGGGGAAACCGUCCUGGUCGGCACG  
HAdV-F40 UUCGCGGUUCAGGAGGUACUCCUCGCGAUCCUUCAGUAAUCUUCGGCAGGAAAGCCACGCUCGUCGCGG  
HAdV-G52 UUCGCGAUUGAGGAGGUAUUCUUCGCGGUCUUUCAGUACUCUUCGGCGGGAAUCUUUUUCGUCCGCUCC

**C.**

HAdV-A12 ---GAACUCCGCGCAAGGAGCUAAGCGUCUGCAUAUCCACCGGGUCGGAGAACCUUUCAAGAAAGGCAUCUAGCCAGUCACAGUCACAAG  
HAdV-B3 ---GUACUCCGCGCAAGGACCUGAUCGUCUCAAGAUAUCCACGGGAUCUGAAAACCUUUCGACGAAAGCGUCUAACCAGUCGCAAUCGCAAG  
HAdV-B11 ---GGACUGCACGCAGAGAUCUGAUCGUGUCAAGAUAUCCACGGGAUCUGAAAACCUUUCGACGAAAGCGUCUAACCAGUCACAGUCACAAG  
HAdV-C2 GUACUCCGCCACCGAGGGACCUGAGCGAGUCCGCAUCGACCGGAUCGGAAAACCUUCGAGAAAGCGUCUAACCAGUCACAGUCGCAAG  
HAdV-D37 -----GGCACGUGAGCGCGUCGAGAUCCACCGGAUCGGAGAAUCUUCGAGGAAAGCGUCUAGCCAAUCGCAGUCGCAAG  
HAdV-E4 ---GGACUCCGCGCAAGGACCUAAGCGUCUCJAGAUCCACGGGAUCUGAAAACCUUUGAACGAAGGUUCGAGCCAGUCGCAGUCGCAAG  
HAdV-F40 GUAGAGACUGCCAAGCCUCAUUGAGCGAGUCCAGUUGGACGGGAUCAGAGAAUUUUCGAGGAAAGCUUCAGCCAAUCGCAGUCGCAAG  
HAdV-G52 ---GCACUCCGUGCAGGGAUCUGAGAACGUCGAGGUCGACGGGAUCCGAGAAUCUCUCUAGGAAAGCGUCUAUCCAAUCGCAAUCGCAAG

**A**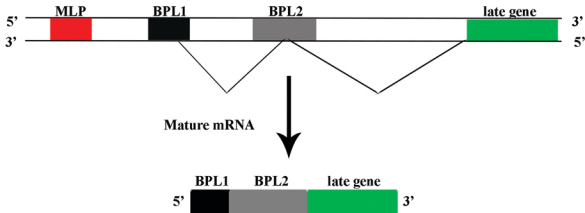**B**

| Virus species and type | Percent Identity Matrix: BPL1-2 |         |          |         |          |         |          |          |
|------------------------|---------------------------------|---------|----------|---------|----------|---------|----------|----------|
|                        | HAdV-A12                        | HAdV-B3 | HAdV-B11 | HAdV-C2 | HAdV-D37 | HAdV-E4 | HAdV-F40 | HAdV-G52 |
| MAV-2                  | 41.24                           | 45.88   | 45.36    | 42.86   | 41.99    | 45.88   | 41.84    | 41.75    |

| Virus species and type | GenBank accession number | BPL1  |      |    | BPL2  |       |     | Length BPL1-2 |
|------------------------|--------------------------|-------|------|----|-------|-------|-----|---------------|
|                        |                          | Start | End  | nt | Start | End   | nt  |               |
| MAV-2                  | HM049560                 | 6251  | 6332 | 82 | 10115 | 10255 | 141 | 223           |

Supplemental Table 1. Virus genome sequences, GenBank accession numbers, and tripartite leader start and end points and lengths.

| Species and<br>type of<br>viruses | GenBank<br>accession<br>number | TPL1  |      |    | TPL2  |      |    | TPL3  |      |    | Length<br>TPL1-3 |
|-----------------------------------|--------------------------------|-------|------|----|-------|------|----|-------|------|----|------------------|
|                                   |                                | Start | End  | nt | Start | End  | nt | Start | End  | nt | Sum<br>nt        |
| HAdV-A12                          | NC_001460                      | 5802  | 5842 | 41 | 6864  | 6935 | 72 | 9370  | 9456 | 87 | 200              |
| HAdV-A18                          | GU191019.1                     | 5799  | 5839 | 41 | 6861  | 6932 | 72 | 9370  | 9456 | 87 | 200              |
| HAdV-A31                          | AM749299.1                     | 5715  | 5755 | 41 | 6777  | 6848 | 72 | 9256  | 9342 | 87 | 200              |
| HAdV-A61                          | JF964962.1                     | 5713  | 5753 | 41 | 6775  | 6846 | 72 | 9254  | 9340 | 87 | 200              |
| HAdV-B3                           | DQ086466.1                     | 5903  | 5943 | 41 | 6962  | 7033 | 72 | 9477  | 9563 | 87 | 200              |
| HAdV-B7                           | HQ659699.1                     | 5904  | 5944 | 41 | 6963  | 7034 | 72 | 9478  | 9564 | 87 | 200              |
| HAdV-B11                          | AF532578.1                     | 5919  | 5959 | 41 | 6978  | 7049 | 72 | 9493  | 9579 | 87 | 200              |
| HAdV-B21                          | KJ364588.1                     | 5901  | 5941 | 41 | 6960  | 7031 | 72 | 9475  | 9561 | 87 | 200              |
| HAdV-B14                          | JN032132.1                     | 5939  | 5979 | 41 | 6998  | 7069 | 72 | 9513  | 9599 | 87 | 200              |
| HAdV-B16                          | JN860680.1                     | 5795  | 5835 | 41 | 6854  | 6925 | 72 | 9369  | 9455 | 87 | 200              |
| HAdV-B34                          | AY737797.1                     | 5921  | 5961 | 41 | 6981  | 7052 | 72 | 9495  | 9581 | 87 | 200              |
| HAdV-B35                          | AC_000019.1                    | 5921  | 5961 | 41 | 6980  | 7051 | 72 | 9495  | 9581 | 87 | 200              |
| HAdV-B50                          | AY737798.1                     | 5900  | 5940 | 41 | 6959  | 7030 | 72 | 9474  | 9560 | 87 | 200              |
| HAdV-B55                          | FJ643676.1                     | 5925  | 5965 | 41 | 6984  | 7055 | 72 | 9499  | 9585 | 87 | 200              |
| HAdV-B66                          | JN860676.1                     | 5903  | 5943 | 41 | 6962  | 7033 | 72 | 9477  | 9563 | 87 | 200              |
| HAdV-B68                          | JN860678.1                     | 5902  | 5942 | 41 | 6961  | 7032 | 72 | 9476  | 9562 | 87 | 200              |
| HAdV-C1                           | JX173086.1                     | 6062  | 6102 | 41 | 7125  | 7196 | 72 | 9654  | 9743 | 90 | 203              |
| HAdV-C2                           | J01917.1                       | 6039  | 6079 | 41 | 7101  | 7172 | 72 | 9634  | 9723 | 90 | 203              |
| HAdV-C5                           | AC_000008.1                    | 6049  | 6089 | 41 | 7111  | 7182 | 72 | 9644  | 9733 | 90 | 203              |
| HAdV-C6                           | KF268129.1                     | 6064  | 6104 | 41 | 7127  | 7198 | 72 | 9659  | 9748 | 90 | 203              |
| HAdV-C57                          | HQ003817.1                     | 6057  | 6097 | 41 | 7119  | 7190 | 72 | 9652  | 9741 | 90 | 203              |
| HAdV-D8                           | AB448769.1                     | 5855  | 5895 | 41 | 6917  | 6988 | 72 | 9369  | 9443 | 75 | 188              |
| HAdV-D9                           | AJ854486.1                     | 5854  | 5894 | 41 | 6916  | 6987 | 72 | 9374* | 9448 | 75 | 188              |
| HAdV-D10                          | JN226746.1                     | 5858  | 5898 | 41 | 6920  | 6991 | 72 | 9378  | 9452 | 75 | 188              |
| HAdV-D13                          | JN226747.1                     | 5866  | 5906 | 41 | 6928  | 6999 | 72 | 9377  | 9451 | 75 | 188              |

|          |             |      |      |    |      |      |    |      |      |    |     |
|----------|-------------|------|------|----|------|------|----|------|------|----|-----|
| HAdV-D15 | AB562586.1  | 5862 | 5902 | 41 | 6924 | 6995 | 72 | 9382 | 9456 | 75 | 188 |
| HAdV-D17 | HQ910407.1  | 5846 | 5886 | 41 | 6908 | 6979 | 72 | 9363 | 9437 | 75 | 188 |
| HAdV-D19 | JQ326209.1  | 5837 | 5877 | 41 | 6899 | 6970 | 72 | 9360 | 9434 | 75 | 188 |
| HAdV-D20 | JN226749.1  | 5844 | 5884 | 41 | 6906 | 6977 | 72 | 9364 | 9438 | 75 | 188 |
| HAdV-D22 | FJ619037.1  | 5847 | 5887 | 41 | 6909 | 6980 | 72 | 9367 | 9441 | 75 | 188 |
| HAdV-D23 | JN226750.1  | 5846 | 5886 | 41 | 6908 | 6979 | 72 | 9363 | 9437 | 75 | 188 |
| HAdV-D24 | JN226751.1  | 5851 | 5891 | 41 | 6913 | 6984 | 72 | 9371 | 9445 | 75 | 188 |
| HAdV-D25 | JN226752.1  | 5848 | 5888 | 41 | 6910 | 6981 | 72 | 9368 | 9442 | 75 | 188 |
| HAdV-D26 | EF153474.1  | 5853 | 5893 | 41 | 6915 | 6986 | 72 | 9373 | 9447 | 75 | 188 |
| HAdV-D27 | JN226753.1  | 5858 | 5898 | 41 | 6920 | 6991 | 72 | 9378 | 9452 | 75 | 188 |
| HAdV-D28 | FJ824826.1  | 5849 | 5889 | 41 | 6911 | 6982 | 72 | 9369 | 9443 | 75 | 188 |
| HAdV-D29 | JN226754.1  | 5858 | 5898 | 41 | 6920 | 6991 | 72 | 9378 | 9452 | 75 | 188 |
| HAdV-D30 | JN226755.1  | 5852 | 5892 | 41 | 6914 | 6985 | 72 | 9372 | 9446 | 75 | 188 |
| HAdV-D32 | JN226756.1  | 5852 | 5892 | 41 | 6914 | 6985 | 72 | 9372 | 9446 | 75 | 188 |
| HAdV-D33 | JN226758.1  | 5853 | 5893 | 41 | 6915 | 6986 | 72 | 9373 | 9447 | 75 | 188 |
| HAdV-D36 | GQ384080.1  | 5848 | 5888 | 41 | 6910 | 6981 | 72 | 9368 | 9442 | 75 | 188 |
| HAdV-D37 | DQ900900.1  | 5857 | 5897 | 41 | 6919 | 6990 | 72 | 9377 | 9451 | 75 | 188 |
| HAdV-D38 | JN226759.1  | 5864 | 5904 | 41 | 6926 | 6997 | 72 | 9387 | 9461 | 75 | 188 |
| HAdV-D39 | JN226760.1  | 5855 | 5895 | 41 | 6917 | 6988 | 72 | 9375 | 9449 | 75 | 188 |
| HAdV-D42 | JN226761.1  | 5849 | 5889 | 41 | 6911 | 6982 | 72 | 9372 | 9446 | 75 | 188 |
| HAdV-D43 | JN226762.1  | 5852 | 5892 | 41 | 6914 | 6985 | 72 | 9375 | 9449 | 75 | 188 |
| HAdV-D44 | JN226763.1  | 5854 | 5894 | 41 | 6916 | 6987 | 72 | 9374 | 9448 | 75 | 188 |
| HAdV-D45 | JN226764.1  | 5849 | 5889 | 41 | 6911 | 6982 | 72 | 9366 | 9440 | 75 | 188 |
| HAdV-D46 | AY875648.1  | 5850 | 5890 | 41 | 6912 | 6983 | 72 | 9367 | 9441 | 75 | 188 |
| HAdV-D47 | JN226757.1  | 5853 | 5893 | 41 | 6915 | 6986 | 72 | 9373 | 9447 | 75 | 188 |
| HAdV-D48 | EF153473.1  | 5850 | 5890 | 41 | 6912 | 6983 | 72 | 9370 | 9444 | 75 | 188 |
| HAdV-D49 | DQ393829.1  | 5849 | 5889 | 41 | 6911 | 6982 | 72 | 9369 | 9443 | 75 | 188 |
| HAdV-D51 | JN226765.1  | 5848 | 5888 | 41 | 6910 | 6981 | 72 | 9365 | 9439 | 75 | 188 |
| HAdV-D53 | AB605246.1  | 5858 | 5898 | 41 | 6920 | 6991 | 72 | 9378 | 9452 | 75 | 188 |
| HAdV-D54 | NC_012959.1 | 5860 | 5900 | 41 | 6922 | 6993 | 72 | 9374 | 9448 | 75 | 188 |
| HAdV-D56 | HM770721.2  | 5857 | 5897 | 41 | 6919 | 6990 | 72 | 9377 | 9451 | 75 | 188 |
| HAdV-D58 | HQ883276.1  | 5859 | 5899 | 41 | 6921 | 6992 | 72 | 9382 | 9456 | 75 | 188 |
| HAdV-D59 | JF799911.1  | 5856 | 5896 | 41 | 6918 | 6989 | 72 | 9376 | 9450 | 75 | 188 |
| HAdV-D60 | HQ007053.1  | 5852 | 5892 | 41 | 6914 | 6985 | 72 | 9372 | 9446 | 75 | 188 |

|            |             |      |      |    |      |      |    |      |      |    |     |
|------------|-------------|------|------|----|------|------|----|------|------|----|-----|
| HAdV-D62   | JN162671.1  | 5852 | 5892 | 41 | 6914 | 6985 | 72 | 9366 | 9440 | 75 | 188 |
| HAdV-D63   | JN935766.1  | 5852 | 5892 | 41 | 6914 | 6985 | 72 | 9372 | 9446 | 75 | 188 |
| HAdV-D64   | EF121005.1  | 5858 | 5898 | 41 | 6920 | 6991 | 72 | 9378 | 9452 | 75 | 188 |
| HAdV-D65   | AP012285.1  | 5850 | 5890 | 41 | 6912 | 6983 | 72 | 9370 | 9444 | 75 | 188 |
| HAdV-D67   | AP012302.1  | 5851 | 5891 | 41 | 6913 | 6984 | 72 | 9371 | 9445 | 75 | 188 |
| HAdV-D69   | JN226748.1  | 5846 | 5886 | 41 | 6908 | 6979 | 72 | 9366 | 9440 | 75 | 188 |
| HAdV-D70   | KP641339.1  | 5858 | 5898 | 41 | 6920 | 6991 | 72 | 9381 | 9455 | 75 | 188 |
| HAdV-D71   | KF268207.1  | 5848 | 5888 | 41 | 6910 | 6981 | 72 | 9368 | 9442 | 75 | 188 |
| HAdV-D72   | KF268335.1  | 5847 | 5887 | 41 | 6909 | 6980 | 72 | 9364 | 9438 | 75 | 188 |
|            |             |      |      |    |      |      |    |      |      |    |     |
| HAdV-E4    | NC_003266.2 | 5885 | 5925 | 41 | 6947 | 7018 | 72 | 9456 | 9542 | 87 | 200 |
|            |             |      |      |    |      |      |    |      |      |    |     |
| HAdV-F40** | NC_001454.1 | 5599 | 5639 | 41 | 6661 | 6732 | 72 | 9167 | 9256 | 90 | 203 |
| HAdV-F41   | AB728839.1  | 5590 | 5630 | 41 | 6652 | 6723 | 72 | 9161 | 9250 | 90 | 203 |
|            |             |      |      |    |      |      |    |      |      |    |     |
| HAdV-G52   | DQ923122.2  | 5548 | 5588 | 41 | 6610 | 6681 | 72 | 9110 | 9196 | 87 | 200 |

**Murine**

|       |            |      |      |    |       |       |     |  |  |  |     |
|-------|------------|------|------|----|-------|-------|-----|--|--|--|-----|
| MAV-2 | HM049560.1 | 6251 | 6332 | 82 | 10115 | 10255 | 141 |  |  |  | 223 |
|-------|------------|------|------|----|-------|-------|-----|--|--|--|-----|

Only HAdV-D37 annotations were determined by direct sequencing of mRNA.

\*In GenBank, HAdV-D9 TPL3 begins at nucleotide no. 9271.

\*\*In GenBank, HAdV-F40 TPL 1 and 3 are not annotated.



Supplemental Table 2. Identity comparisons for TPL1,2, and 3 for representative viruses from each HAdV species.

| species and type | Percent Identity Matrix: TPL 1 |         |          |         |          |         |          |          |
|------------------|--------------------------------|---------|----------|---------|----------|---------|----------|----------|
|                  | HAdV-A12                       | HAdV-B3 | HAdV-B11 | HAdV-C2 | HAdV-D37 | HAdV-E4 | HAdV-F40 | HAdV-G52 |
| HAdV-A12         | 100.00                         |         |          |         |          |         |          |          |
| HAdV-B3          | 73.17                          | 100.00  |          |         |          |         |          |          |
| HAdV-B11         | 68.29                          | 95.12   | 100.00   |         |          |         |          |          |
| HAdV-C2          | 75.61                          | 85.37   | 80.49    | 100.00  |          |         |          |          |
| HAdV-D37         | 78.05                          | 90.24   | 85.37    | 90.24   | 100.00   |         |          |          |
| HAdV-E4          | 73.17                          | 100.00  | 95.12    | 85.37   | 90.24    | 100.00  |          |          |
| HAdV-F40         | 75.61                          | 80.49   | 78.05    | 82.93   | 82.93    | 80.49   | 100.00   |          |
| HAdV-G52         | 75.61                          | 80.49   | 75.61    | 82.93   | 82.93    | 80.49   | 95.12    | 100.00   |
| species and type | Percent Identity Matrix: TPL 2 |         |          |         |          |         |          |          |
|                  | HAdV-A12                       | HAdV-B3 | HAdV-B11 | HAdV-C2 | HAdV-D37 | HAdV-E4 | HAdV-F40 | HAdV-G52 |
| HAdV-A12         | 100.00                         |         |          |         |          |         |          |          |
| HAdV-B3          | 77.78                          | 100.00  |          |         |          |         |          |          |
| HAdV-B11         | 76.39                          | 93.06   | 100.00   |         |          |         |          |          |
| HAdV-C2          | 63.89                          | 76.39   | 76.39    | 100.00  |          |         |          |          |
| HAdV-D37         | 66.67                          | 72.22   | 70.83    | 70.83   | 100.00   |         |          |          |
| HAdV-E4          | 68.06                          | 86.11   | 86.11    | 79.17   | 70.83    | 100.00  |          |          |
| HAdV-F40         | 70.83                          | 75.00   | 77.78    | 68.06   | 72.22    | 73.61   | 100.00   |          |
| HAdV-G52         | 75.00                          | 77.78   | 79.17    | 73.61   | 70.83    | 75.00   | 80.56    | 100.00   |
| species and type | Percent Identity Matrix: TPL 3 |         |          |         |          |         |          |          |
|                  | HAdV-A12                       | HAdV-B3 | HAdV-B11 | HAdV-C2 | HAdV-D37 | HAdV-E4 | HAdV-F40 | HAdV-G52 |
| HAdV-A12         | 100.00                         |         |          |         |          |         |          |          |
| HAdV-B3          | 77.01                          | 100.00  |          |         |          |         |          |          |
| HAdV-B11         | 74.71                          | 88.51   | 100.00   |         |          |         |          |          |
| HAdV-C2          | 73.56                          | 74.71   | 74.71    | 100.00  |          |         |          |          |
| HAdV-D37         | 73.33                          | 78.67   | 77.33    | 81.33   | 100.00   |         |          |          |
| HAdV-E4          | 80.46                          | 86.21   | 79.31    | 68.97   | 73.33    | 100.00  |          |          |
| HAdV-F40         | 58.62                          | 62.07   | 62.07    | 62.22   | 80.00    | 60.92   | 100.00   |          |
| HAdV-G52         | 67.82                          | 77.01   | 73.56    | 68.97   | 81.33    | 70.11   | 64.37    | 100.00   |

Supplemental Table 3. Sequence and GC content for TPL1, by virus.

| Type no. | TPL1                                                                                           | A | T  | G  | C  | Sum | A/T   | G/C   |
|----------|------------------------------------------------------------------------------------------------|---|----|----|----|-----|-------|-------|
| HAdV-A12 | GCTTTCTTCTGCTTCGCTGTTTACGAGCGCCAACCTGGTTGG                                                     | 4 | 15 | 11 | 11 | 41  | 46.34 | 53.66 |
| HAdV-A18 | GCTTTCTTCTGCA <sup>A</sup> TCGCTGTTTACGAGCGCCA <sup>G</sup> CTG <sup>T</sup> TGGG              | 4 | 14 | 12 | 11 | 41  | 43.90 | 56.10 |
| HAdV-A31 | GCT <sup>G</sup> TCTTC <sup>G</sup> GGCTTCGCTGTTTACGAGCGCCA <sup>G</sup> CTG <sup>T</sup> TGGC | 3 | 13 | 13 | 12 | 41  | 39.02 | 60.98 |
| HAdV-A61 | GCT <sup>G</sup> TCTTC <sup>G</sup> GGCTTCGCTGTTTACGAGCGCCA <sup>G</sup> CTG <sup>T</sup> TGGG | 3 | 13 | 14 | 11 | 41  | 39.02 | 60.98 |
| HAdV-B3  | ACTGTCTTCCGGATCGCTGTCCAGGAGCGCCAGCTGTTGGG                                                      | 5 | 10 | 14 | 12 | 41  | 36.59 | 63.41 |
| HAdV-B7  | ACTGTCTTCCGGATCGCTGTCCAGGAGCGCCAGCTGTTGGG                                                      | 5 | 10 | 14 | 12 | 41  | 36.59 | 63.41 |
| HAdV-B11 | ACTGTCTTCCGGATCGCTGTCCAGGA <sup>ACG</sup> T <sup>C</sup> AGCTGTTGGG                            | 6 | 11 | 13 | 11 | 41  | 41.46 | 58.54 |
| HAdV-B14 | ACTGTCTTCCGGATCGCTGTCCAGGA <sup>ACG</sup> T <sup>C</sup> AGCTGTTGGG                            | 6 | 11 | 13 | 11 | 41  | 41.46 | 58.54 |
| HAdV-B16 | ACTGTCTTCCGGATCGCTGTCCAGGAGCGCCAGCTGTTGGG                                                      | 5 | 10 | 14 | 12 | 41  | 36.59 | 63.41 |
| HAdV-B21 | ACTGTCTTC <sup>AGG</sup> ATCGCTGTCCAGGAGCGCCAGCTGTTGGG                                         | 6 | 10 | 14 | 11 | 41  | 39.02 | 60.98 |
| HAdV-B34 | ACTGTCTTCCGGATCGCTGTCCAGGA <sup>ACG</sup> T <sup>C</sup> AGCTGTTGGG                            | 6 | 11 | 13 | 11 | 41  | 41.46 | 58.54 |
| HAdV-B35 | ACTGTCTTCCGGATCGCTGTCCAGGA <sup>ACG</sup> T <sup>C</sup> AGCTGTTGGG                            | 6 | 11 | 13 | 11 | 41  | 41.46 | 58.54 |
| HAdV-B50 | ACTGTCTTCCGGATC <sup>A</sup> CTGTCCAGGAGCGCCAGCTGTTGGG                                         | 6 | 10 | 13 | 12 | 41  | 39.02 | 60.98 |
| HAdV-B55 | ACTGTCTTCCGGATCGCTGTCCAGGA <sup>ACG</sup> T <sup>C</sup> AGCTGTTGGG                            | 6 | 11 | 13 | 11 | 41  | 41.46 | 58.54 |
| HAdV-B66 | ACTGTCTTCCGGATCGCTGTCCAGGAGCGCCAGCTGTTGGG                                                      | 5 | 10 | 14 | 12 | 41  | 36.59 | 63.41 |
| HAdV-B68 | ACTGTCTTC <sup>AGG</sup> ATCGCTGTCCAGGAGCGCCAGCTGTTGGG                                         | 6 | 10 | 14 | 11 | 41  | 39.02 | 60.98 |
| HAdV-C1  | ACTCTCTTCCGCATCGCTGTCTGCGAGGGCCAGCTGTTGGG                                                      | 4 | 11 | 13 | 13 | 41  | 36.59 | 63.41 |
| HAdV-C2  | ACTCTCTTCCGCATCGCTGTCTGCGAGGGCCAGCTGTTGGG                                                      | 4 | 11 | 13 | 13 | 41  | 36.59 | 63.41 |
| HAdV-C5  | ACTCTCTTCCGCATCGCTGTCTGCGAGGGCCAGCTGTTGGG                                                      | 4 | 11 | 13 | 13 | 41  | 36.59 | 63.41 |
| HAdV-C6  | ACTCTCTTCCGCATCGCTGTCTGCGAGGGCCAGCTGTTGGG                                                      | 4 | 11 | 13 | 13 | 41  | 36.59 | 63.41 |
| HAdV-C57 | ACTCTCTTCCGCATCGCTGTCTGCGAGGGCCAGCTGTTGGG                                                      | 4 | 11 | 13 | 13 | 41  | 36.59 | 63.41 |
| HAdV-D8  | ACTCTCTTCCGCGTCGCTGTCCACGAGCGTCAGCTGTTGGG                                                      | 4 | 11 | 12 | 14 | 41  | 36.59 | 63.41 |
| HAdV-D9  | ACTCTCTTCCGCGTCGCTGTCCACGAGCG <sup>C</sup> CAGCTGTTGGG                                         | 4 | 10 | 12 | 15 | 41  | 34.15 | 65.85 |
| HAdV-D10 | ACTCTCTTCCGCGTCGCTGTCCACGAGCG <sup>C</sup> CAGCTGTTGGG                                         | 4 | 10 | 12 | 15 | 41  | 34.15 | 65.85 |
| HAdV-D13 | ACTCTCTTCCGCGTCGCTGTCCACGAGCG <sup>C</sup> CAGCTGTTGGG                                         | 4 | 10 | 12 | 15 | 41  | 34.15 | 65.85 |
| HAdV-D15 | ACTCTCTTCCGCGTCGCTGTCCACGAGCG <sup>C</sup> CAGCTGTTGGG                                         | 4 | 10 | 12 | 15 | 41  | 34.15 | 65.85 |
| HAdV-D17 | ACTCTCTTCCGCGTCGCTGTCCACGAGCG <sup>C</sup> CAGCTGTTGGG                                         | 4 | 10 | 12 | 15 | 41  | 34.15 | 65.85 |
| HAdV-D19 | ACTCTCTTCCGCGTCGCTGTCCACGAGCG <sup>C</sup> CAGCTGTTGGG                                         | 4 | 10 | 12 | 15 | 41  | 34.15 | 65.85 |
| HAdV-D20 | ACTCTCTTCCGCGTCGCTGTCCACGAGCG <sup>C</sup> CAGCTGTTGGG                                         | 4 | 10 | 12 | 15 | 41  | 34.15 | 65.85 |



|          |                                           |   |    |    |    |    |       |       |
|----------|-------------------------------------------|---|----|----|----|----|-------|-------|
| HAdV-D67 | ACTCTCTTCCGCGTCGCTGTCCACGAGCGCCAGCTGTTGGG | 4 | 10 | 12 | 15 | 41 | 34.15 | 65.85 |
| HAdV-D69 | ACTCTCTTCCGCGTCGCTGTCTACGAGCGCCAGCTGTTGGG | 4 | 11 | 12 | 14 | 41 | 36.59 | 63.41 |
| HAdV-D70 | ACTCTCTTCCGCGTCGCTGTCCACGAGCGCCAGCTGTTGGG | 4 | 10 | 12 | 15 | 41 | 34.15 | 65.85 |
| HAdV-D71 | ACTCTCTTCCGCGTCGCTGTCCACGAGCGCCAGCTGTTGGG | 4 | 10 | 12 | 15 | 41 | 34.15 | 65.85 |
| HAdV-D72 | ACTCTCTTCCGCGTCGCTGTCCACGAGCGCCAGCTGTTGGG | 4 | 10 | 12 | 15 | 41 | 34.15 | 65.85 |
| HAdV-E4  | ACTGTCTTCCGGATCGCTGTCCAGGAGCGCCAGCTGTTGGG | 5 | 10 | 14 | 12 | 41 | 36.59 | 63.41 |
| HAdV-F40 | ACTTTCTTCCGCATCGCTGTGGACGACAGCCAGCTGTTCCG | 6 | 11 | 11 | 13 | 41 | 41.46 | 58.54 |
| HAdV-F41 | ACTTTCTTCCGCATCGCTGTGGCAGAGCCAGCTGTTCCG   | 6 | 11 | 12 | 12 | 41 | 41.46 | 58.54 |
| HAdV-G52 | ACTTTCTTCCGCATCGCTGTGGACCAGAGCCAGCTGTTCCG | 6 | 11 | 11 | 13 | 41 | 41.46 | 58.54 |

Nucleotide differences from the paradigm (first) type in each species shown in red.

Supplemental Table 4. Sequence and GC content for TPL2, by virus.

| Type no. | TPL2                                                                      | A  | T  | G  | C  | Sum | A/T   | G/C   |
|----------|---------------------------------------------------------------------------|----|----|----|----|-----|-------|-------|
| HAdV-A12 | TTCTTGATTTAGGAGGTATTCCTCCTTATCCTTCCAGTACTCCTCCAGGGGAAACCCATTTGCATCTGCACG  | 14 | 24 | 13 | 21 | 72  | 52.78 | 47.22 |
| HAdV-A18 | TTGTTGGTTTAGGAGGTATTCCTTTCCTTGCCTTCCAATACTCTTCCACGGGAAAACCGTCTGCATTTGCACG | 13 | 26 | 15 | 18 | 72  | 54.17 | 45.83 |
| HAdV-A31 | TTCTTGTTTAGGAGGTATTCCTGTTTATCCTTCCAATACTCCTCTACAGGGAAACCATCTGCATCAGCGCG   | 15 | 24 | 14 | 19 | 72  | 54.17 | 45.83 |
| HAdV-A61 | TTCTTGTTTAGGAGGTATTCCTGTTTATCCTTCCAATACTCCTCTAAAGGGAAACCATCTGCATCAGCGCG   | 16 | 24 | 14 | 18 | 72  | 55.56 | 44.44 |
| HAdV-B3  | CTCGCGTTGAGAAGGTATTCCTTCGTGATCCTTCCAGTACTCCTTCGAGGGGAAACCCGCTTTTTTCTGCACG | 12 | 23 | 18 | 19 | 72  | 48.61 | 51.39 |
| HAdV-B7  | CTCGCGTTGAGAAGGTATTCCTTCGTGATCCTTCCAGTACTCCTTCGAGGGGAAACCCGCTTTTTTCTGCACG | 12 | 23 | 18 | 19 | 72  | 48.61 | 51.39 |
| HAdV-B11 | TTTCGCGTTGAGAAGGTATTCCTTCGCGATCCTTCCAGTACTCCTCTAGCGGAAACCCGCTTTTGTCTGCACG | 12 | 23 | 17 | 20 | 72  | 48.61 | 51.39 |
| HAdV-B21 | CTCGCGTTGAGAAGGTATTCCTTCGCGATCCTTCCAGTACTCCTTCGAGGGGAAACCCGCTTTTTTCTGCACG | 12 | 22 | 18 | 20 | 72  | 47.22 | 52.78 |
| HAdV-B14 | TTTCGCGTTGAGAAGGTATTCCTTCGCGATCCTTCCAGTACTCCTCTAGCGGAAACCCGCTTTTGTCTGCACG | 12 | 23 | 17 | 20 | 72  | 48.61 | 51.39 |
| HAdV-B16 | CTCGCGTTGAGAAGGTATTCCTTCGCGATCCTTCCAGTACTCCTTCGAGGGGAAACCCGCTTTTTTCTGCACG | 12 | 22 | 18 | 20 | 72  | 47.22 | 52.78 |
| HAdV-B34 | TTTCGCGTTGAGAAGGTATTCCTTCGCGATCCTTCCAGTACTCCTCTAGCGGAAACCCGCTTTTGTCTGCACG | 12 | 23 | 17 | 20 | 72  | 48.61 | 51.39 |
| HAdV-B35 | TTTCGCGTTGAGAAGGTATTCCTTCGCGATCCTTCCAGTACTCCTCTAGCGGAAACCCGCTTTTGTCTGCACG | 12 | 23 | 17 | 20 | 72  | 48.61 | 51.39 |
| HAdV-B50 | CTCGCGTTGAGAAGGTATTCCTTCGCGATCCTTCCAGTACTCCTTCGAGGGGAAACCCGCTTTTTTCTGCACG | 12 | 22 | 18 | 20 | 72  | 47.22 | 52.78 |
| HAdV-B55 | TTTCGCGTTGAGAAGGTATTCCTTCGCGATCCTTCCAGTACTCCTCTAGCGGAAACCCGCTTTTGTCTGCACG | 12 | 23 | 16 | 21 | 72  | 48.61 | 51.39 |
| HAdV-B66 | CTCGCGTTGAGAAGGTATTCCTTCGCGATCCTTCCAGTACTCCTTCGAGGGGAAACCCGCTTTTTTCTGCACG | 12 | 22 | 18 | 20 | 72  | 47.22 | 52.78 |
| HAdV-B68 | CTCGCGTTGAGAAGGTATTCCTTCGCGATCCTTCCAGTACTCCTTCGAGGGGAAACCCGCTTTTTTCTGCACG | 12 | 22 | 18 | 20 | 72  | 47.22 | 52.78 |
| HAdV-C1  | CTCGCGTTGAGGACAAACTCTTCGCGGTCTTTCCAGTACTCCTTGGATCGGAAACCCGTCGGCCTCCGAACG  | 13 | 17 | 19 | 23 | 72  | 41.67 | 58.33 |
| HAdV-C2  | CTCGCGTTGAGGACAAACTCTTCGCGGTCTTTCCAGTACTCCTTGGATCGGAAACCCGTCGGCCTCCGAACG  | 13 | 17 | 19 | 23 | 72  | 41.67 | 58.33 |
| HAdV-C5  | CTCGCGTTGAGGACAAACTCTTCGCGGTCTTTCCAGTACTCCTTGGATCGGAAACCCGTCGGCCTCCGAACG  | 13 | 17 | 19 | 23 | 72  | 41.67 | 58.33 |
| HAdV-C6  | CTCGCGTTGAGGACAAACTCTTCGCGGTCTTTCCAGTACTCCTTGGATCGGAAACCCGTCGGCCTCCGAACG  | 13 | 17 | 19 | 23 | 72  | 41.67 | 58.33 |
| HAdV-C57 | CTCGCGTTGAGGACAAACTCTTCGCGGTCTTTCCAGTACTCCTTGGATCGGAAACCCGTCGGCCTCCGAACG  | 13 | 17 | 19 | 23 | 72  | 41.67 | 58.33 |
| HAdV-D8  | CTCGCGTTAAGGGCGTACTCCTCGTCATCCTTCCAGTACTCCCAGGAGCGGGAATCCTTGATCGTCCGCACG  | 11 | 17 | 19 | 25 | 72  | 38.89 | 61.11 |
| HAdV-D9  | CTCGCGTTGAGGGCGTACTCCTCGTCATCCTTCCAGTACTCCCAGGAGCGGGAATCCTCGATCGTCCGCACG  | 10 | 16 | 20 | 26 | 72  | 36.11 | 63.89 |
| HAdV-D10 | CTCGCGTTGAGGGCGTACTCCTCGTCATCCTTCCAGTACTCCCAGGAGCGGGAATCCTCGATCGTCCGCACG  | 10 | 16 | 20 | 26 | 72  | 36.11 | 63.89 |
| HAdV-D13 | CTCGCGTTGAGGGCGTACTCCTCGTCATCCTTCCAGTACTCCCAGGAGCGGGAATCCTCGATCGTCCGCACG  | 10 | 16 | 20 | 26 | 72  | 36.11 | 63.89 |
| HAdV-D15 | CTCGCGTTGAGGGCATACTCCTCGTCATCCTTCCAGTACTCCCAGGAGCGGGAATCCTCGATCGTCCGCACG  | 11 | 16 | 19 | 26 | 72  | 37.50 | 62.50 |
| HAdV-D17 | CTCGCGTTGAGGGCGTATTCCTCGTCATCCTTCCAGTACTCCCAGGAGCGGGAATCCTCGATCGTCCGCACG  | 10 | 17 | 20 | 25 | 72  | 37.50 | 62.50 |
| HAdV-D19 | CTCGCGTTGAGGGCGTATTCCTCGTCATCCTTCCAGTACTCCCAGGAGCGGGAATCCTAGATCGTCCGCACG  | 11 | 17 | 20 | 24 | 72  | 38.89 | 61.11 |
| HAdV-D20 | CTCGCGTTGAGGGCGTACTCCTCGTCATCCTTCCAGTACTCCCAGGAGCGGGAATCCTCGATCGTCCGCACG  | 10 | 16 | 20 | 26 | 72  | 36.11 | 63.89 |



|          |                                                                           |    |    |    |    |    |       |       |
|----------|---------------------------------------------------------------------------|----|----|----|----|----|-------|-------|
| HAdV-D67 | CTCGCGGTTGAGGGCGTACTCCTCGTCATCCTTCCAGTACTCCCGGAGCGGAATCCTCGATCGTCCGCACG   | 11 | 16 | 19 | 26 | 72 | 37.50 | 62.50 |
| HAdV-D69 | CTCGCGGTTGAGGGCGTACTCCTCGTCATCCTTCCAGTACTCCCGGAGCGGGAATCCTCGATCGTCCGCACG  | 10 | 16 | 20 | 26 | 72 | 36.11 | 63.89 |
| HAdV-D70 | CTCGCGGTTGAGGGCGTACTCCTCGTCATCCTTCCAGTACTCCCGGAGCGGGAATCCTCGATCGTCCGCACG  | 10 | 16 | 20 | 26 | 72 | 36.11 | 63.89 |
| HAdV-D71 | CTCGCGGTTGAGGGCGTACTCCTCGTCATCCTTCCAGTACTCCCGGAGCGGGAATCCTCGATCGTCCGCACG  | 10 | 16 | 20 | 26 | 72 | 36.11 | 63.89 |
| HAdV-D72 | CTCGCGGTTGAGGGCATACTCCTCGTCATCCTTCCAGTACTCCCGGAGCGGGAATCCTCGATCGTCCGCACG  | 11 | 16 | 19 | 26 | 72 | 37.50 | 62.50 |
| HAdV-E4  | CTCGCGGTTGAGAAGGAACTCTTCGCGGTCTTCCAGTACTCTTCAAGGGGAACCCGTCTGGTCCGCACG     | 12 | 16 | 22 | 22 | 72 | 38.89 | 61.11 |
| HAdV-F40 | TTCGCGGTTCAGGAGGTACTCCTCGCGATCCTTCCAGTAATCTTCGGCAGGAAAGCCACGCTCGTCTGC GCG | 12 | 17 | 20 | 23 | 72 | 40.28 | 59.72 |
| HAdV-F41 | TTCGCGGTTCAGGAGGTACTCCTCGCGGTCCTTCCAGTAATCTTCGGCCGGAAAGCCACGTTTCGTCTGCACG | 11 | 18 | 20 | 23 | 72 | 40.28 | 59.72 |
| HAdV-G52 | TTCGCGATTGAGGAGGTATCCTCGCGGTCTTCCAGTACTCTTCGGCGGGAATCCTTTTCGTCCGCTCG      | 9  | 24 | 19 | 20 | 72 | 45.83 | 54.17 |

Nucleotide differences from the paradigm (first) type in each species shown in red.

Supplemental Table 5. Sequence and GC content for TPL3, by virus.

| Type no. | TPL3                                                                                      | A  | T  | G  | C  | Sum | A/T   | G/C   |
|----------|-------------------------------------------------------------------------------------------|----|----|----|----|-----|-------|-------|
| HAdV-A12 | GAACTCCGCGCAAGGAGCTAAGCGTCTGCATATCCACCGGGTCGGAGAACCTTTCAAGAAAGGCATCTAGCCAGTCACAGTCACAAG   | 26 | 14 | 22 | 25 | 87  | 45.98 | 54.02 |
| HAdV-A18 | GAACTCCGCGCAAGGAGCTGAGTGTGTCCATATCCACCGGATCAGAAAATTTTCAAGGAAGGCATCTAGCCAATCGCAGTCACAAG    | 27 | 17 | 21 | 22 | 87  | 50.57 | 49.43 |
| HAdV-A31 | AAACTCCGCGCCAGGACCTAAGCGACTGCATATCTACTGGGTCTGAAAACCTTTCAAGGAAGGCCTCAATCCAGTCACAGTCACAAG   | 27 | 15 | 20 | 25 | 87  | 48.28 | 51.72 |
| HAdV-A61 | GAACTCCGCGCCAGGACCTAAGCGACTGCATATCTACTGGGTCTGAAAACCTTTCAAGGAAGGCCTCAATCCAGTCACAGTCACAAG   | 26 | 16 | 20 | 25 | 87  | 48.28 | 51.72 |
| HAdV-B3  | GTACTCCGCGCAAGGACCTGATCGTCTCAAGATCCACGGGATCTGAAAACCTTTTCGACGAAAGCGTCTAACCAGTCGCAATCGCAAG  | 25 | 16 | 20 | 26 | 87  | 47.13 | 52.87 |
| HAdV-B7  | GTACTCCGCGCAAGGACCTGATTTGTCTCAAGATCCACGGGATCTGAAAACCTTTTCGACGAAAGCGTCTAACCAGTCGCAATCGCAAG | 25 | 17 | 20 | 25 | 87  | 48.28 | 51.72 |
| HAdV-B11 | GGACTGCACGCGAGAGATCTGATCGTGTCAAGATCCACGGGATCTGAAAACCTTTTCGACGAAAGCGTCTAACCAGTCACAGTCACAAG | 27 | 16 | 21 | 23 | 87  | 49.43 | 50.57 |
| HAdV-B21 | GTACTCCGCGCAAGGACCTGATCGTCTCAAGATCCACGGGATCTGAAAACCTTTTCGACGAAAGCGTCTAACCAGTCGCAATCGCAAG  | 25 | 16 | 20 | 26 | 87  | 47.13 | 52.87 |
| HAdV-B14 | GGACTGCGCGCAGAGATCTGATCGTGTCAAGATCCACGGGATCTGAAAACCTTTCAACGAAAGCGTCTAACCAGTCACAGTCACAAG   | 27 | 16 | 21 | 23 | 87  | 49.43 | 50.57 |
| HAdV-B16 | GTACTCCGCGCAAGGACCTGATCGTCTCAAGATCCACGGGATCTGAAAACCTTTCAACGAAAGCGTCTAACCAGTCGCAATCGCAAG   | 26 | 16 | 19 | 26 | 87  | 48.28 | 51.72 |
| HAdV-B34 | GGACTGCGCGCAGAGATCTGATCGTGTCAAGATCCACGGGATCTGAAAACCTTTTCGACGAAAGCGTCTAACCAGTCACAGTCACAAG  | 26 | 16 | 22 | 23 | 87  | 48.28 | 51.72 |
| HAdV-B35 | GGACTGCGCGCAGAGATCTGATCGTGTCAAGATCCACGGGATCTGAAAACCTTTTCGACGAAAGCGTCTAACCAGTCACAGTCACAAG  | 26 | 16 | 22 | 23 | 87  | 48.28 | 51.72 |
| HAdV-B50 | GTACTCCGCGCAAGGACCTGATCGTCTCAAGATCCACGGGATCTGAAAACCTTTTCGACGAAAGCGTCTAACCAGTCGCAATCGCAAG  | 25 | 16 | 20 | 26 | 87  | 47.13 | 52.87 |
| HAdV-B55 | GGACTGCGCGCAGAGATCTGATCGTGTCAAGATCCACGGGATCTGAAAACCTTTCAACGAAAGCGTCTAACCAGTCACAGTCACAAG   | 27 | 16 | 21 | 23 | 87  | 49.43 | 50.57 |
| HAdV-B66 | GTACTCCGCGCAAGGACCTGATCGTTTCAAGATCCACGGGATCTGAAAACCTTTTCGACGAAAGCGTCTAACCAGTCGCAATCGCAAG  | 25 | 17 | 20 | 25 | 87  | 48.28 | 51.72 |
| HAdV-B68 | GTACTCCGCGCAAGGACCTGATCGTCTCAAGATCCACGGGATCTGAAAACCTTTTCGACGAAAGCGTCTAACCAGTCGCAATCGCAAG  | 25 | 16 | 20 | 26 | 87  | 47.13 | 52.87 |
| HAdV-C1  | GTACTCCGCCACCGAGGGACCTGAGCGAGTCCGCATCGACCGGATCGGAAAACCTCTCGAGAAAGCGTCTAACCAGTCACAGTCGCAAG | 24 | 12 | 25 | 29 | 90  | 40.00 | 60.00 |
| HAdV-C2  | GTACTCCGCCACCGAGGGACCTGAGCGAGTCCGCATCGACCGGATCGGAAAACCTCTCGAGAAAGCGTCTAACCAGTCACAGTCGCAAG | 24 | 12 | 25 | 29 | 90  | 40.00 | 60.00 |
| HAdV-C5  | GTACTCCGCCCCGAGGGACCTGAGCGAGTCCGCATCGACCGGATCGGAAAACCTCTCGAGAAAGCGTCTAACCAGTCACAGTCGCAAG  | 23 | 12 | 26 | 29 | 90  | 38.89 | 61.11 |
| HAdV-C6  | GTACTCCGCCCCGAGGGACCTGAGCGAGTCCGCATCGACCGGATCGGAAAACCTCTCGAGAAAGCGTCTAACCAGTCACAGTCGCAAG  | 23 | 12 | 26 | 29 | 90  | 38.89 | 61.11 |
| HAdV-C57 | GTACTCCGCCACCGAGGGACCTGAGCGAGTCCGCATCGACCGGATCGGAAAACCTCTCGAGAAAGCGTCTAACCAGTCACAGTCGCAAG | 24 | 12 | 25 | 29 | 90  | 40.00 | 60.00 |
| HAdV-D8  | GGGACGTAAAGCAGTCAAGATCGACCGGATCGGAAAATTTTGAAGGAAAGCGTCTAGCCAATCGCAGTCACAAG                | 25 | 13 | 21 | 16 | 75  | 50.67 | 49.33 |
| HAdV-D9  | GGGACGTGAGCGCTCGAGATCGACCGGATCGGAAATCTTTTCGAGGAAAGCGTCTAGCCAATCGCAGTCGCAAG                | 19 | 12 | 26 | 18 | 75  | 41.33 | 58.67 |
| HAdV-D10 | GGGACGTGAGCGCTCGAGATCGACCGGATCGGAAATCTTTTCGAGGAAAGCGTCTAGCCAATCGCAGTCGCAAG                | 19 | 12 | 26 | 18 | 75  | 41.33 | 58.67 |
| HAdV-D13 | GGGACGTGAGCGCTCGAGATCGACCGGATCGGAAATCTTTTCGAGGAAAGCGTCTAGCCAATCGCAGTCGCAAG                | 19 | 12 | 26 | 18 | 75  | 41.33 | 58.67 |
| HAdV-D15 | GGGACGTGAGAGCGTCTGAGATCGACCGGATCGGAAATCTTTTCGAGGAAAGCGTCTAGCCAATCGCAGTCGCAAG              | 20 | 12 | 26 | 17 | 75  | 42.67 | 57.33 |
| HAdV-D17 | GGGACGTGAGCGCTCGAGATCGACCGGATCGGAAATCTTTTCGAGGAAAGCGTCTAGCCAATCGCAGTCGCAAG                | 19 | 12 | 26 | 18 | 75  | 41.33 | 58.67 |
| HAdV-D19 | GGGACGTGAGCGCTCGAGATCGACCGGATCGGAAATCTTTTCGAGGAAAGCGTCTAGCCAATCGCAGTCGCAAG                | 19 | 12 | 27 | 17 | 75  | 41.33 | 58.67 |
| HAdV-D20 | GGGACGTGAGCGCTCGAGATCGACCGGATCGGAAATCTTTTCGAGGAAAGCGTCTAGCCAATCGCAGTCGCAAG                | 19 | 12 | 26 | 18 | 75  | 41.33 | 58.67 |





|          |                                                                                            |    |    |    |    |    |       |       |
|----------|--------------------------------------------------------------------------------------------|----|----|----|----|----|-------|-------|
| HAdV-D67 | GGGACGTGAGCGCGTCGAGATCGACCGGATCGGAGAATCTTTCGAGGAAAGCGTCTAGCCAATCGCAGTCGCAAG                | 19 | 12 | 26 | 18 | 75 | 41.33 | 58.67 |
| HAdV-D69 | GGGACGTGAGCGCGTCGAGATCGACCGGATCGGAGAATCTTTCGAGGAAAGCGTCTAGCCAATCGCAGTCGCAAG                | 19 | 12 | 26 | 18 | 75 | 41.33 | 58.67 |
| HAdV-D70 | GGGACGTGAGCGCGTCGAGATCGACCGGATCGGAGAATCTTTCGAGGAAAGCGTCTAGCCAATCGCAGTCGCAAG                | 20 | 12 | 25 | 18 | 75 | 42.67 | 57.33 |
| HAdV-D71 | GGGACGTGAGCGCGTCGAGATCGACCGGATCGGAGAATCTTTCGAGGAAAGCGTCTAGCCAATCGCAGTCGCAAG                | 19 | 12 | 26 | 18 | 75 | 41.33 | 58.67 |
| HAdV-D72 | GGGACGTGAGCGCGTCGAGATCGACCGGATCGGAGAATCTTTCGAGGAAAGCGTCTAGCCAATCGCAGTCGCAAG                | 19 | 12 | 26 | 18 | 75 | 41.33 | 58.67 |
| <br>     |                                                                                            |    |    |    |    |    |       |       |
| HAdV-E4  | GGACTCCGCGCAAGGACCTAAGCGTCTCTAGATCCACGGGATCTGAAAACCGTTGAACGAAGGCTTCGAGCCAGTCGCAGTCGCAAG    | 23 | 14 | 25 | 25 | 87 | 42.53 | 57.47 |
| <br>     |                                                                                            |    |    |    |    |    |       |       |
| HAdV-F40 | GTAGAGACTGCCAAGCCTCATTTGAGCGAGTCCAGTTGGACGGGATCAGAGAATTTTCGAGGAAAGCTTCCAGCCAATCGCAGTCGCAAG | 25 | 18 | 26 | 21 | 90 | 47.78 | 52.22 |
| HAdV-F41 | GCAGAGATTGCCAAGCGTTGTTGAGCAAGTCCAATTGGACGGGATCAGAAAACCTTTCAGGAAAGCATCGAGCCAATCACAGTCGCAAG  | 30 | 17 | 24 | 19 | 90 | 52.22 | 47.78 |
| <br>     |                                                                                            |    |    |    |    |    |       |       |
| HAdV-G52 | GCACTCCGTGCAGGGATCTGAGAACGTCGAGGTCGACGGGATCCGAGAACTTCTCTAGGAAAGCGTCTATCCAATCGCAATCGCAAG    | 23 | 16 | 25 | 23 | 87 | 44.83 | 55.17 |

Nucleotide differences from the paradigm (first) type in each species shown in red.

Supplemental Table 6. i-leader start, end, and splice sites for representative viruses of each HAdV species.

| Species and type of virus | i-leader |      |        | i-leader to TPL3 start (ATG)/ splice (end) |      |        |      |     | i-protein mRNA (unspliced) |      |        |
|---------------------------|----------|------|--------|--------------------------------------------|------|--------|------|-----|----------------------------|------|--------|
|                           | Start    | End  | Length | Start                                      | End  | Length | TPL3 | Sum | Start                      | End  | Length |
| HAdV-A12                  | 7705     | 7730 | 26     | 7731                                       | 8138 | 408    | 21   | 429 | 7731                       | 8219 | 489    |
| HAdV-B3                   | 7803     | 7828 | 26     | 7829                                       | 8227 | 399    | 21   | 420 | 7829                       | 8425 | 597    |
| HAdV-B11                  | 7819     | 7844 | 26     | 7845                                       | 8243 | 399    | 21   | 420 | 7845                       | 8255 | 411    |
| HAdV-C2                   | 7952     | 7977 | 26     | 7978                                       | 8391 | 414    | 24   | 438 | 7978                       | 8427 | 450    |
| HAdV-D37                  | 7760     | 7785 | 26     | 7786                                       | 8166 | 381    | 9    | 390 | 7786                       | 8253 | 468    |
| HAdV-E4                   | 7788     | 7813 | 26     | 7814                                       | 8212 | 399    | 21   | 420 | 7814                       | 8407 | 594    |
| HAdV-F40                  | 7510     | 7535 | 26     | 7536                                       | 8088 | 553    | 24   | 577 | 7536                       | 8226 | 691    |
| HAdV-G52                  | 7436     | 7450 | 15     | 7478                                       | 7686 | 209    | 21   | 230 | 7478                       | 7636 | 159    |

Supplemental Table 7. Putative j-leader start and end sites, identity comparisons to HAdV-D37, and genomic sequences in HAdV-D.

| Name     | j-leader |       | Portions | Identities (%) (vs HAdV-D37) | Sequence                                                                                                                        |
|----------|----------|-------|----------|------------------------------|---------------------------------------------------------------------------------------------------------------------------------|
|          | Start    | End   |          |                              |                                                                                                                                 |
| HAdV-D37 | 26764    | 26889 | 126/126  | 100.0                        | AGGGAACCTACCAGTGCCAGAGCGGACCTTGCTTCCACAGTTTACTTTGGTGAACGTTACCGGCAGCAGCACAGCCGCTCCAGAACTAACCTTCCTTCTGATACTATCAAACCTTGTTCGGAG     |
| HAdV-D64 | 26781    | 26906 | 126/126  | 100.0                        | AGGGAACCTACCAGTGCCAGAGCGGACCTTGCTTCCACAGTTTACTTTGGTGAACGTTACCGGCAGCAGCACAGCCGCTCCAGAACTAACCTTCCTTCTGATACTATCAAACCTTGTTCGGAG     |
| HAdV-D9  | 26750    | 26875 | 123/126  | 97.6                         | AGGGAACCTACCAGTGCCAGAGCGGACCTTGCTTCCACAGTTTACTTTGGTGAACGTTACCGGCAGCAGCACAGCCGCTCCAGAACTAACCTTCCTTCTGATACTATCAAACCTCGTTTCGGAG    |
| HAdV-D10 | 26735    | 26860 | 123/126  | 97.6                         | AGGGAACCTACCAGTGCCAGAGCGGACCTTGCTTCCACAGTTTACTTTGGTGAACGTTACCGGCAGCAGCACAGCCGCTCCAGAACTAACCTTCCTTCTGATACTATCAAACCTCGTTTCGGAG    |
| HAdV-D15 | 26772    | 26897 | 121/126  | 96.0                         | AGGGAACCTACCAGTGCTGAGTGGACCTTGCTTCCACAGTTTACTTTGGTGAACGTTACCGGCAGCAGCACAGCCGCTCCAGAACTAACCTTCCTTCTGATACTAACAAACCTCGTTTCGGAG     |
| HAdV-D60 | 26679    | 26804 | 121/126  | 96.0                         | AGGGAACCTACCAGTGCTGAGTGGACCTTGCTTCCACAGTTTACTTTGGTGAACGTTACCGGCAGCAGCACAGCCGCTCCAGAACTAACCTTCCTTCTGATACTAACAAACCTCGTTTCGGAG     |
| HAdV-D48 | 26750    | 26875 | 119/126  | 94.4                         | AAGGAACTTACCAGTGCCAGAGCGGACCTTGCTTCCACAGTTTACTTTGGTGAACGTTACCGGCAGCAGCACAGCCGCTCCAGAACTAACCTTCCTTCTGATACTAACAAACCTCGTTTCGGAG    |
| HAdV-D24 | 26720    | 26848 | 118/129  | 91.5                         | AAGGAACTTACCAGTGCCAGAGCGGACCTTGCTTCCACAGTTTACTTTGGTGAACGTTACCGGCAGCAGCACAGCCGCTCCAGAACTAACCTTCTTCTGATACTAACAAACCTCGTGTCCGGAG    |
| HAdV-D46 | 26732    | 26860 | 118/129  | 91.5                         | AAGGAACTTACCAGTGCCAGAGCGGACCTTGCTTCCACAGTTTACTTTGGTGAACGTTACCGGCAGCAGCACAGCCGCTCCAGAACTAACCTTCTTCTGATACTAACAAACCTCGTGTCCGGAG    |
| HAdV-D13 | 26768    | 26896 | 115/129  | 89.1                         | AGGGAACCTACCAGTGCCAGAGCGGACCTTGCTTCCACAGTTTACTTTGGTGAACGTTACCGGCAGCAGCACAGCCGCTCCAGAACTAACCTTCTTCTGATACTAACAAACCTCGTGTCCGGAG    |
| HAdV-D47 | 26779    | 26907 | 111/129  | 86.0                         | AAGGAACTTACTACTGCCAGAGCGGAGTTGCTACCACAGTTTACTTTGGTGAACGTTACCGGCAGCAGTACAACCCGCTCCAGAACTAACCTTCTTCTGATACTAACAAACCTCATTTCCGGAG    |
| HAdV-D56 | 26716    | 26841 | 116/135  | 85.9                         | AGGGAACCTACCAGTGCCAGAGCGGACCTTGCTTCCACAGTTTACTTTGGTGAACGTTACCGGCAGCAGCACAGCCGCTCCAGAACTAACCTTCCTTCTGATACTATCAAACCTCGTTTCGGAG    |
| HAdV-D33 | 26743    | 26868 | 107/127  | 84.3                         | AGGGAACCTACCAGTGCC-GACACGGACCTTGCTTCCACAGTTTACTTTGGTGAACGTTACCGGCAGCAGCACAGTTGCTCCTGAACTAACCTTCTTCTGATACTAACAAACCTCGTGTCCGGAG   |
| HAdV-D43 | 26688    | 26813 | 107/127  | 84.3                         | AGGGAACCTACCAGTGCC-GACACGGACCTTGCTTCCACAGTTTACTTTGGTGAACGTTACCGGCAGCAGCACAGTTGCTCCTGAACTAACCTTCTTCTGATACTAACAAACCTCGTGTCCGGAG   |
| HAdV-D36 | 26739    | 26864 | 112/133  | 84.2                         | AAGGAACTTACCAGTGCCAGAGCGGACCTTGCTTCCACAGTTTACTTTGGTGAACGTTACCGGCAGCAGCACAGTTGCTCCTGAACTAACCTTCTTCTGATACTAACACTCTAAAAC-----CGGAG |
| HAdV-D29 | 26754    | 26882 | 114/136  | 83.8                         | AGGGAACCTACCAGTGCCAGAGCGGACCTTGCTTCCACAGTTTACTTTGGTGAACGTTACCGGCAGCAGCACAGCCGCTCCAGAACTAACCTTCTTCTGATACTAACACTCTAAAAC-----CGGAG |
| HAdV-D63 | 26718    | 26846 | 114/136  | 83.8                         | AGGGAACCTACCAGTGCCAGAGCGGACCTTGCTTCCACAGTTTACTTTGGTGAACGTTACCGGCAGCAGCACAGCCGCTCCAGAACTAACCTTCTTCTGATACTAACACTCTAAAAC-----CGGAG |
| HAdV-D27 | 26714    | 26839 | 106/127  | 83.5                         | AGGGAACCTACCAGTGCC-GACACGGACCTTGCTTCCACAGTTTACTTTGGTGAACGTTACCGGCAGCAGCACAGTTGCTCCTGAAAGTAACTTCTTCTGATACTAACAAACCTCGTGTCCGGAG   |
| HAdV-D32 | 26767    | 26892 | 106/127  | 83.5                         | AGGGAACCTACCAGTGCC-GACACGGACCTTGCTTCCACAGTTTACTTTGGTGAACGTTACCGGCAGCAGCACAGTTGCTCCTGAAAGTAACTTCTTCTGATACTAACAAACCTCGTGTCCGGAG   |
| HAdV-D38 | 26756    | 26884 | 110/132  | 83.3                         | AGGGAACCTACCAGTGCC-GACACGGACCTTGCTTCCACAGTTTACTTTGGTGAACGTTACCGGCAGCAGCACAGTTGCTCCTGAACTAACCTTCTTCTGATACTAACAAACCTCGTGTCCGGAG   |
| HAdV-D49 | 26760    | 26888 | 110/132  | 83.3                         | AGGGAACCTACCAGTGCC-GACACGGACCTTGCTTCCACAGTTTACTTTGGTGAACGTTACCGGCAGCAGCACAGTTGCTCCTGAACTAACCTTCTTCTGATACTAACAAACCTCGTGTCCGGAG   |
| HAdV-D71 | 26778    | 26906 | 110/132  | 83.3                         | AGGGAACCTACCAGTGCC-GACACGGACCTTGCTTCCACAGTTTACTTTGGTGAACGTTACCGGCAGCAGCACAGTTGCTCCTGAACTAACCTTCTTCTGATACTAACAAACCTCGTGTCCGGAG   |
| HAdV-D72 | 26735    | 26863 | 110/132  | 83.3                         | AGGGAACCTACCAGTGCC-GACACGGACCTTGCTTCCACAGTTTACTTTGGTGAACGTTACCGGCAGCAGCACAGTTGCTCCTGAACTAACCTTCTTCTGATACTAACAAACCTCGTGTCCGGAG   |
| HAdV-D20 | 26758    | 26886 | 113/136  | 83.1                         | AGGGAACCTACCAGTGCCAGAGCGGACCTTGCTTCCACAGTTTACTTTGGTGAACGTTACCGGCAGCAGCACAGCCGCTCCAGAACTAACCTTCTTCTGATACTAACACTCTAAAAC-----CGGAG |
| HAdV-D22 | 26731    | 26859 | 113/136  | 83.1                         | AGGGAACCTACCAGTGCCAGAGCGGACCTTGCTTCCACAGTTTACTTTGGTGAACGTTACCGGCAGCAGCACAGCCGCTCCAGAACTAACCTTCTTCTGATACTAACACTCTAAAAC-----CGGAG |
| HAdV-D44 | 26742    | 26870 | 113/136  | 83.1                         | AGGGAACCTACCAGTGCCAGAGCGGACCTTGCTTCCACAGTTTACTTTGGTGAACGTTACCGGCAGCAGCACAGCCGCTCCAGAACTAACCTTCTTCTGATACTAACACTCTAAAAC-----CGGAG |
| HAdV-D45 | 26763    | 26891 | 113/136  | 83.1                         | AGGGAACCTACCAGTGCCAGAGCGGACCTTGCTTCCACAGTTTACTTTGGTGAACGTTACCGGCAGCAGCACAGCCGCTCCAGAACTAACCTTCTTCTGATACTAACACTCTAAAAC-----CGGAG |
| HAdV-D23 | 26703    | 26831 | 112/136  | 82.4                         | AGGGAACCTACCAGTGCCAGAGCGGACCTTGCTTCCACAGTTTACTTTGGTGAACGTTACCGGCAGCAGCACAGCCGCTCCAGAACTAACCTTCTTCTGAACTAACACTCTAAAAC-----CGGAG  |
| HAdV-D25 | 26746    | 26874 | 112/136  | 82.4                         | AGGGAACCTACCAGTGCCAGAGCGGACCTTGCTTCCACAGTTTACTTTGGTGAACGTTACCGGCAGCAGCACAGCCGCTCCAGAACTAACCTTCTTCTGATACTAACACTCTAAAAC-----CGGAG |

|          |       |       |         |      |                                                                                                                                        |
|----------|-------|-------|---------|------|----------------------------------------------------------------------------------------------------------------------------------------|
| HAdV-D42 | 26781 | 26909 | 112/136 | 82.4 | AGGGAACCTACCAGTCCAGAGCGGACCTTGCTTCCACACTTTCACCTTTGGTGAACGTTAACGACAGCAGCACAGCCGCTCCAGAAACATCTAACCTTCTTTCTGATACTAACACTCCTAAAAC-----CGGAG |
| HAdV-D17 | 26754 | 26882 | 111/136 | 81.6 | AGGGAACCTACCAGTCCAGAGCGGACCTTGCTTCCACACTTTCACCTTTGGTGAACGTTACCAGACAGCAGCACAGCCGTACAGAAACATCTAACCTTCTTTTGGATACTAACACTCCTAAAACCGGAG      |
| HAdV-D28 | 26743 | 26871 | 106/130 | 81.5 | AGGGAACCTACCAGTCCAGAGCGGACCTTGCTTCCACACTTTCACCTTTGGTGAACGTTAACGACAGCAGCACAGTGTGCTCTGAAACAACCTAACCTTCTTCTGATACTAACAAACCTCGTGTCCGGAG     |
| HAdV-D30 | 26711 | 26839 | 106/130 | 81.5 | AGGGAACCTACCAGTCCAGAGCGGACCTTGCTTCCACACTTTCACCTTTGGTGAACGTTAACGACAGCAGTACAGTGTGCTCTGAAACAACCTAACCTTCTTCTGATACTAACAAACCTCGTGTCCGGAG     |
| HAdV-D39 | 26763 | 26891 | 106/130 | 81.5 | AGGGAACCTACCAGTCCAGAGCGGACCTTGCTTCCACACTTTCACCTTTGGTGAACGTTAACGACAGCAGTACAGTGTGCTCTGAAACAACCTAACCTTCTTCTGATACTAACAAACCTCGTGTCCGGAG     |
| HAdV-D62 | 26750 | 26878 | 106/130 | 81.5 | AGGGAACCTACCAGTCCAGAGCGGACCTTGCTTCCACACTTTCACCTTTGGTGAACGTTAACGACAGCAGTACAGTGTGCTCTGAAACAACCTAACCTTCTTCTGATACTAACAAACCTCGTGTCCGGAG     |
| HAdV-D53 | 26696 | 26821 | 110/136 | 80.9 | AGGGAACCTACCAGTCCAGAGCGGACCTTGCTTCCACACTTTCACCTTTGGTGAACGTTAACGACAGCAGCACAGCCGCTCCAGAAACATCTAACCT---TTTTGATACTAACACTCCTAAAAC-----CGGAG |
| HAdV-D58 | 26776 | 26904 | 105/130 | 80.8 | AGGGAACCTACCAGTCCAGAGCGGACCTTGCTTCCACACTTTCACCTTTGGTGAACGTTAACGACAGCAGTACAGTGTGCTCTGAAACAACCTAACCTTCTTCTGATACTAACAAACCTCGTGTCCGGAG     |
| HAdV-D8  | 26697 | 26818 | 103/128 | 80.5 | AAGGAACTTACCATTGTCCAGAGCGGACCTTGCTCACCACA-TTTTCCATTTGGTGAACGTTACCAGCAGCAGCAACA---GCTCC-GAAACTAACCTTCTTCTGATACTAACAGACCTAATTT-GGAG      |
| HAdV-D59 | 26763 | 26888 | 109/136 | 80.1 | AGGGAACCTACCAGTCCAGAGCGGACCTTGCTTCCACACTTTCACCTTTGGTGAACGTTAACGACAGCAGCGCAGCCGCTCCAGAAACATCTAACCT---TTTTGATACTAACACTCCTAAAAC-----CGGAG |
| HAdV-D69 | 26730 | 26855 | 109/136 | 80.1 | AGGGAACCTACCAGTCCAGAGCGGACCTTGCTTCCACACTTTCACCTTTGGTGAACGTTACCAGCAGCAGCAGTCCGCTCCAGAAACATCTAACCT---TTTTGATACTAACACTCCTAAAAC-----CGGAG  |
| HAdV-D26 | 26778 | 26900 | 108/136 | 79.4 | AGGGAACCTACCAGTCCAGAGCGGACCTTGCTTCCACACTTTCACCTTTGGTGAACGTTACCAGCAGCAGCAACAGC---TCAGAAACTAACCTTCTTCTGATACTAACAAACCTCGTTTCGGAG          |
| HAdV-D19 | 26767 | 26889 | 101/128 | 78.9 | AAGGAACTTACCATTGTCCAGAGCGGACCTTGCTCACCACA-TTTTCCATTTGGTGAACGTTACCAGCAGCAGCAACAGC---TCAGAAACTAACCTTCTTCTGATACTAACAGACCTCAATTCGGAG       |
| HAdV-D51 | 26770 | 26892 | 101/128 | 78.9 | AAGGAACTTACCATTGTCCAGAGCGGACCTTGCTCACCACA-TTTTCCATTTGGTGAACGTTACCAGCAGCAGCAACAGC---TCAGAAACTAACCTTCTTCTGATACTAACAGACCTCAATTCGGAG       |
| HAdV-D54 | 26623 | 26745 | 102/130 | 78.5 | AAGGAACTTACCATTGTCCAGAGCGGACCTTGCTCACCACA-TTTTCCATTTGGTGAACGTTACCAGCAGCAGCAACAGC---TCAGAAACTAACCTTCTTCTGATACTAACAGACCTCAATTCGGAG       |
| HAdV-D65 | 26770 | 26889 | 98/128  | 76.6 | AAGGAACTTACCATTGTCCAGAGCGGACCTTGCTCACCACA-TTTTCCATTTGGTGAACGTTACCAGCAGCAGCAACAGC---TCAGAAACTAACCT---CTCTGATACTAACAGACCTCAATTCGGAG      |
| HAdV-D70 | 26736 | 26864 | 105/139 | 75.5 | AGGGAACCTACCAGTCCAGAGCGGACCTTGCTTCCACACTTTCACCTTTGGTGAACGTTAACGACAGCAGTACAGTGTGCTCTGAAACAACCTAACCTTCTTCTGATACTAACAAACCTCGTGTCCGGAG     |
| HAdV-D67 | 26738 | 26860 | 99/136  | 72.8 | AGGGAACCTATCATTTGCCAGAGCGGACCTTGCTTCCACACTTTCACCTTTGGTGAACGTTACCAGCAGCAGCAACAGC---TCAGAAACTAACCTTCTTCTGATACTAACAGACCTCATTTCGGAG        |

---

Supplemental Table 8. Comparison of individual TPLs with BPLs.

TPL1 vs. BPL1 vs. BPL2

| Virus species and type | HAdV-A12 | HAdV-B3 | HAdV-B11 | HAdV-C2 | HAdV-D37 | HAdV-E4 | HAdV-F40 | HAdV-G52 | MAV2-BPL1 | MAV2-BPL2 |
|------------------------|----------|---------|----------|---------|----------|---------|----------|----------|-----------|-----------|
| HAdV-A12               | 100.00   |         |          |         |          |         |          |          |           |           |
| HAdV-B3                | 73.17    | 100.00  |          |         |          |         |          |          |           |           |
| HAdV-B11               | 68.29    | 95.12   | 100.00   |         |          |         |          |          |           |           |
| HAdV-C2                | 75.61    | 85.37   | 80.49    | 100.00  |          |         |          |          |           |           |
| HAdV-D37               | 78.05    | 90.24   | 85.37    | 90.24   | 100.00   |         |          |          |           |           |
| HAdV-E4                | 73.17    | 100.00  | 95.12    | 85.37   | 90.24    | 100.00  |          |          |           |           |
| HAdV-F40               | 75.61    | 80.49   | 78.05    | 82.93   | 82.93    | 80.49   | 100.00   |          |           |           |
| HAdV-G52               | 75.61    | 80.49   | 75.61    | 82.93   | 82.93    | 80.49   | 95.12    | 100.00   |           |           |
| MAV2-BPL1              | 51.22    | 48.78   | 46.34    | 48.78   | 48.78    | 48.78   | 56.10    | 56.10    | 100.00    |           |
| MAV2-BPL2              | 53.66    | 53.66   | 53.66    | 53.66   | 53.66    | 53.66   | 56.10    | 51.22    | 50.00     | 100.00    |

TPL2 vs. BPL1 vs. BPL2

| Virus species and type | HAdV-A12 | HAdV-B3 | HAdV-B11 | HAdV-C2 | HAdV-D37 | HAdV-E4 | HAdV-F40 | HAdV-G52 | MAV2-BPL1 | MAV2-BPL2 |
|------------------------|----------|---------|----------|---------|----------|---------|----------|----------|-----------|-----------|
| HAdV-A12               | 100.00   |         |          |         |          |         |          |          |           |           |
| HAdV-B3                | 77.78    | 100.00  |          |         |          |         |          |          |           |           |
| HAdV-B11               | 76.39    | 93.06   | 100.00   |         |          |         |          |          |           |           |
| HAdV-C2                | 63.89    | 76.39   | 76.39    | 100.00  |          |         |          |          |           |           |
| HAdV-D37               | 66.67    | 72.22   | 70.83    | 70.83   | 100.00   |         |          |          |           |           |
| HAdV-E4                | 68.06    | 86.11   | 86.11    | 79.17   | 70.83    | 100.00  |          |          |           |           |
| HAdV-F40               | 70.83    | 75.00   | 77.78    | 68.06   | 72.22    | 73.61   | 100.00   |          |           |           |
| HAdV-G52               | 75.00    | 77.78   | 79.17    | 73.61   | 70.83    | 75.00   | 80.56    | 100.00   |           |           |
| MAV2-BPL1              | 32.79    | 37.70   | 34.43    | 36.07   | 40.98    | 36.07   | 34.43    | 37.70    | 100.00    |           |
| MAV2-BPL2              | 37.50    | 43.06   | 43.06    | 41.67   | 50.00    | 44.44   | 38.89    | 33.33    | 43.21     | 100.00    |

TPL3 vs. BPL1 vs. BPL2

| <b>Virus species and type</b> | <b>HAdV-A12</b> | <b>HAdV-B3</b> | <b>HAdV-B11</b> | <b>HAdV-C2</b> | <b>HAdV-D37</b> | <b>HAdV-E4</b> | <b>HAdV-F40</b> | <b>HAdV-G52</b> | <b>MAV2-BPL1</b> | <b>MAV2-BPL2</b> |
|-------------------------------|-----------------|----------------|-----------------|----------------|-----------------|----------------|-----------------|-----------------|------------------|------------------|
| HAdV-A12                      | 100.00          |                |                 |                |                 |                |                 |                 |                  |                  |
| HAdV-B3                       | 77.01           | 100.00         |                 |                |                 |                |                 |                 |                  |                  |
| HAdV-B11                      | 74.71           | 88.51          | 100.00          |                |                 |                |                 |                 |                  |                  |
| HAdV-C2                       | 73.56           | 74.71          | 74.71           | 100.00         |                 |                |                 |                 |                  |                  |
| HAdV-D37                      | 73.33           | 78.67          | 77.33           | 81.33          | 100.00          |                |                 |                 |                  |                  |
| HAdV-E4                       | 80.46           | 86.21          | 79.31           | 68.97          | 73.33           | 100.00         |                 |                 |                  |                  |
| HAdV-F40                      | 58.62           | 62.07          | 62.07           | 62.22          | 80.00           | 60.92          | 100.00          |                 |                  |                  |
| HAdV-G52                      | 67.82           | 77.01          | 73.56           | 68.97          | 81.33           | 70.11          | 64.37           | 100.00          |                  |                  |
| MAV2-BPL1                     | 29.63           | 33.33          | 37.04           | 33.33          | 33.33           | 35.19          | 37.04           | 38.89           | 100.00           |                  |
| MAV2-BPL2                     | 39.08           | 45.98          | 43.68           | 40.00          | 36.00           | 43.68          | 36.67           | 39.08           | 53.66            | 100.00           |

Supplemental Table 9. Similarity of entire TPL without and with i-leader included, with entire BPL.  
 TPL1-3 vs BPL1-2

| <b>Virus species and type</b> | <b>HAdV-A12</b> | <b>HAdV-B3</b> | <b>HAdV-B11</b> | <b>HAdV-C2</b> | <b>HAdV-D37</b> | <b>HAdV-E4</b> | <b>HAdV-F40</b> | <b>HAdV-G52</b> | <b>MAV-2</b> |
|-------------------------------|-----------------|----------------|-----------------|----------------|-----------------|----------------|-----------------|-----------------|--------------|
| HAdV-A12                      | 100.00          |                |                 |                |                 |                |                 |                 |              |
| HAdV-B3                       | 76.50           | 100.00         |                 |                |                 |                |                 |                 |              |
| HAdV-B11                      | 74.00           | 91.50          | 100.00          |                |                 |                |                 |                 |              |
| HAdV-C2                       | 72.50           | 79.50          | 77.50           | 100.00         |                 |                |                 |                 |              |
| HAdV-D37                      | 70.81           | 77.84          | 75.68           | 78.19          | 100.00          |                |                 |                 |              |
| HAdV-E4                       | 74.50           | 89.00          | 85.00           | 78.00          | 75.14           | 100.00         |                 |                 |              |
| HAdV-F40                      | 67.00           | 72.00          | 72.50           | 68.47          | 77.66           | 70.50          | 100.00          |                 |              |
| HAdV-G52                      | 72.00           | 78.00          | 76.00           | 75.50          | 77.30           | 74.00          | 78.50           | 100.00          |              |
| MAV-2                         | 41.24           | 45.88          | 45.36           | 42.86          | 41.99           | 45.88          | 41.84           | 41.75           | 100.00       |

TPL1-3 with i-leader(26nt) vs BPL1-2

| <b>Virus species and type</b> | <b>HAdV-A12</b> | <b>HAdV-B3</b> | <b>HAdV-B11</b> | <b>HAdV-C2</b> | <b>HAdV-D37</b> | <b>HAdV-E4</b> | <b>HAdV-F40</b> | <b>HAdV-G52</b> | <b>MAV-2</b> |
|-------------------------------|-----------------|----------------|-----------------|----------------|-----------------|----------------|-----------------|-----------------|--------------|
| HAdV-A12                      | 100.00          |                |                 |                |                 |                |                 |                 |              |
| HAdV-B3                       | 76.11           | 100.00         |                 |                |                 |                |                 |                 |              |
| HAdV-B11                      | 73.45           | 91.15          | 100.00          |                |                 |                |                 |                 |              |
| HAdV-C2                       | 66.81           | 74.34          | 72.57           | 100.00         |                 |                |                 |                 |              |
| HAdV-D37                      | 66.35           | 72.99          | 71.09           | 75.70          | 100.00          |                |                 |                 |              |
| HAdV-E4                       | 73.89           | 89.38          | 85.40           | 72.57          | 70.62           | 100.00         |                 |                 |              |
| HAdV-F40                      | 61.50           | 66.81          | 66.81           | 65.07          | 71.50           | 66.37          | 100.00          |                 |              |
| HAdV-G52                      | 69.30           | 75.35          | 73.49           | 73.49          | 72.46           | 71.63          | 73.02           | 100.00          |              |
| MAV-2                         | 40.98           | 41.95          | 40.49           | 42.31          | 42.56           | 40.98          | 39.42           | 44.95           | 100.00       |



Supplemental Table 10. PCR primers applied in the identification of 5'UTR leader sequences for HAdV-D37.

| <b>Sequence Name</b> | <b>Primer sequence</b>          | <b>Start</b> | <b>End</b> |
|----------------------|---------------------------------|--------------|------------|
| HAdV-D37_52/55K_R    | GCCCCCAGTCTCGCCA                | 10780        | 10765      |
| HAdV-D37_pIIIa_R     | CGCCGCCCTTATGGCGGG              | 11820        | 11803      |
| HAdV-D37_Penton_R    | AGCCATATACCGCGGAGGCACAAA        | 13631        | 13608      |
| HAdV-D37_pVII_R      | GGTGCTGCTGGGAGCGTT              | 15189        | 15172      |
| HAdV-D37_pV_R        | GCACAAACTCTACTGCCCCCTC          | 15860        | 15839      |
| HAdV-D37_pX_R        | GGATGAGCGCGGGCAGAAAG            | 16900        | 16881      |
| HAdV-D37_pVI_R       | <b>TTAAGCCCGCTCCAGACACTGC</b>   | 17163        | 17142      |
| HAdV-D37_Hexon_R     | GTCTAGCACCCGGTTGTGCG            | 18089        | 18070      |
| HAdV-D37_Protease_R  | GCCGGCCGTGTTGACGAT              | 20770        | 20753      |
| HAdV-D37_100K_R      | CCTCCTGGCCTGCGTCT               | 22944        | 22928      |
| HAdV-D37_22K_R       | TGGTGCGGCGACGGGCTG              | 24927        | 24910      |
| HAdV-D37_pVIII_R     | CGGACCCCGTTGACCCG               | 25656        | 25640      |
| HAdV-D37_12.0K_R     | AACCGAGCGAGCTCAGCCGAGT          | 26232        | 26211      |
| HAdV-D37_21.8K_R     | AGTCTGGTTGGTGAGGTAGAC           | 26585        | 26565      |
| HAdV-D37_18.6K_R     | ATCGTGGCTGTTTCGTGGCAT           | 27128        | 27109      |
| HAdV-D37_48.9K_R     | AAAGCTACAAGAAGAGAGAGCAGCACGA    | 27600        | 27573      |
| HAdV-D37_31.6K_R     | CTACACTAAGTGTGACTAGGCTAATCA     | 28918        | 28892      |
| HAdV-D37_10.4K_R     | CGCAGATGTTGAAGAGACAGAAGAGGATGT  | 29770        | 29741      |
| HAdV-D37_14.7K_R     | AGCATAAGTGGCTAGGGCAGGG          | 30050        | 30029      |
| HAdV-D37_14.8K_R     | TTGATGGCATCAAGGAGCTCCTT         | 30497        | 30475      |
| HAdV-D37_Fiber_R     | GAGACAAAGGGGGGAGTGAGGAA         | 31138        | 31116      |
| HAdV-D37_i-leader_F  | GTGACAAAGAGCCGCTCCGTG           | 7760         | 7780       |
| HAdV-D37_i-leader_R  | TCACCCGTGGAGATCAAGTACCATCTG     | 8253         | 8227       |
| HAdV-D37_j-leader_F  | AGGGAACCTACCAGTGCCAGAG          | 26764        | 26785      |
| HAdV-D37_j-leader_R  | AAGGTTTGTATAGTATCAGAAGGAAGGTTAG | 26880        | 26851      |
| HAdV-D37_TPL1_F      | ACTCTCTCCGCGTTCGCTGT            | 5857         | 5876       |
| HAdV-D37_TPL1_R      | CCCAACAGCTGGCGCT                | 5897         | 5882       |
| HAdV-D37_TPL2_F      | GCGCGGTTGAGGGCGTA               | 6920         | 6936       |
| HAdV-D37_TPL2_R      | CCGTGCGGACGATCGAG               | 6991         | 6975       |
| HAdV-D37_TPL3_F      | AAGCGTCTAGCCAATCGCAGTCG         | 9425         | 9447       |
| HAdV-D37_TPL3_R      | CGACTGCGATTGGCTAGACGCTT         | 9447         | 9425       |
